## The Minimum Alveolar Concentration (MAC) of Sevoflurane in Humans

Takasumi Katoh, M.D.,\* Kazuyuki Ikeda, M.D. Ph.D.†

Forty surgical patients were divided into two groups and anesthetized with either sevoflurane and oxygen or sevoflurane, oxygen, and nitrous oxide. The minimum alveolar concentration (MAC) for sevoflurane required to prevent movement in response to surgical incision in healthy patients was  $1.71 \pm 0.07\%$  (SE). The  $AD_{95}$  (anesthetic  $ED_{95}$ ) that prevented 95% of patients from moving was 2.07%. The addition of 63.5% end-tidal nitrous oxide allowed a reduction in the alveolar sevoflurane concentration to  $0.66 \pm 0.06\%$  (SE). The reduction in sevoflurane MAC was 61.4%. The  $AD_{95}$  for sevoflurane with 63.5% end-tidal nitrous oxide was 0.94%. (Key words: Anesthetics, volatile; sevoflurane. Potency, anesthetic: MAC.)

SEVOFLURANE (fluoromethyl 2,2,2-trifluoro-1-[trifluoromethyl] ethyl ether), a new, nonflammable inhalational anesthetic agent, has undergone phase 2 trials in surgical patients in Japan. Rapid induction and recovery consistent with a blood/gas partition coefficient of 0.59 have been reported in a preliminary clinical study<sup>1</sup> and in an animal study.<sup>2</sup> MAC, a measure of anesthetic potency, is the alveolar concentration of anesthetic at which 50% of patients do not move in response to a single stimulus (skin incision).<sup>3</sup> It is used for comparison of the pharmacologic properties of inhalation anesthetics.  $AD_{95}$  (anesthetic  $ED_{95}$ ), the dose that prevents 95% of patients from moving in response to skin incision,<sup>4</sup> has greater clinical utility than MAC. The objectives of the present study are to determine the MAC and the  $AD_{95}$  of sevoflurane in ASA physical status I patients and the effectiveness of nitrous oxide in reducing sevoflurane requirement for surgical anesthesia.

### Materials and Methods

Forty surgical patients of either sex, ASA physical status I, aged 30–59 yr, were studied. All patients had normal respiratory function. They were randomly divided into two groups (A and B). Each group of 20 patients was divided into four subgroups ( $A_1$ ,  $A_2$ ,  $A_3$ , and  $A_4$  or  $B_1$ ,  $B_2$ ,  $B_3$ , and  $B_4$ ) of five patients. The patients did not re-

ceive premedicant drugs. The anesthetic breathing system used was a semiclosed circuit. Anesthesia was induced with sevoflurane and oxygen in group A, or with 60–70% nitrous oxide, sevoflurane, and oxygen in group B. The fresh gas flow rate into the semiclosed circuit was 6 l per min (in group A, oxygen 6 l per min; in group B, 2 l per min oxygen and 4 l per min nitrous oxide). The trachea was intubated with a cuffed endotracheal tube without the use of muscle relaxants or other agents. After tracheal intubation, the end-tidal sevoflurane concentration was reduced to a predetermined level and held constant for at least 15 min prior to the skin incision. End-tidal carbon dioxide concentrations ranged from 30–40 mmHg during the study, and the rate and depth of mechanical ventilation were adjusted so that adequate sampling of end-tidal gas could be performed. Rectal temperature ranged from 35.8–37.0° C in all patients. Gas samples (200 ml/min) were collected with a teflon catheter placed at the tracheal end of the endotracheal tube at 200 ml per min. Sevoflurane, carbon dioxide, nitrous oxide, and oxygen concentrations were measured continuously by means of a mass spectrometer (Perkin-Elmer® MGA 1100; Perkin-Elmer, Pomano, CA). The mass spectrometer was calibrated against known concentrations of sevoflurane, which was verified by calibration with a gas chromatograph (Shimadzu® GC-9A; Shimadzu, Kyoto, Japan). The patients' response to skin incision was reported as movement or non-movement. We considered "movement" to be "gross purposeful muscular movement" usually of the head or extremities. Breath-holding, bucking, or grimacing was not "movement."<sup>3</sup>

The technique used to calculate MAC was adapted from Waud.<sup>5</sup> The doses selected and the sizes of the groups were predetermined to estimate standard error.<sup>4,6</sup> In group  $A_1$ , the end-tidal sevoflurane concentration held constant for more than 15 min ranged from 2.10–2.00% ( $2.05 \pm 0.05\%$ ). In group  $A_2$ , this was  $1.85 \pm 0.05\%$ ; in  $A_3$ ,  $1.65 \pm 0.05\%$ ; and in  $A_4$ ,  $1.45 \pm 0.05\%$ . In each subgroup of group B, the respective values were  $1.0 \pm 0.05$ ,  $0.8 \pm 0.05$ ,  $0.6 \pm 0.05$ , or  $0.4 \pm 0.05\%$ , and the end-tidal nitrous oxide concentration ranged from 62.5–64.5%. Individual observations were fitted to a logistic curve by iterative technique, based on a Taylor series expansion. Analyses were performed with a PASCAL program that furnished median and slope values with their standard errors, as well as an expression for the best-fitting

\* Research trainee.

† Chairman, Department of Anesthesiology.

Received from The Department of Anesthesiology, Hamamatsu University School of Medicine, Handa-Cho, Hamamatsu city, Shizuoka 431-31 Japan. Accepted for publication September 24, 1986.

Address reprint requests to Dr. Katoh: Department of Anesthesiology, Hamamatsu University School of Medicine, 3600 Handa-Cho, Hamamatsu City, Shizuoka 431-31, Japan.

TABLE 1. Data Obtained in Group A, Sevoflurane Alone

| Group                        | Age | F <sub>E</sub> (%) | F <sub>I</sub> (%) | $\frac{(F_I - F_E)}{F_E} \times 100$ | Movement | Duration (Min) |
|------------------------------|-----|--------------------|--------------------|--------------------------------------|----------|----------------|
| A <sub>1</sub><br>2.10-2.00% | 43  | 2.03               | 2.21               | 8.94                                 | No       | 21             |
|                              | 43  | 2.04               | 2.25               | 10.1                                 | No       | 20             |
|                              | 49  | 2.07               | 2.19               | 5.58                                 | No       | 29             |
|                              | 58  | 2.10               | 2.26               | 7.48                                 | No       | 16             |
|                              | 52  | 2.03               | 2.27               | 11.8                                 | No       | 21             |
| A <sub>2</sub><br>1.90-1.80% | 50  | 1.85               | 2.12               | 14.3                                 | Yes      | 30             |
|                              | 59  | 1.86               | 2.02               | 8.89                                 | No       | 15             |
|                              | 42  | 1.85               | 1.98               | 6.70                                 | No       | 21             |
|                              | 53  | 1.85               | 2.01               | 8.48                                 | Yes      | 16             |
|                              | 52  | 1.82               | 1.99               | 9.55                                 | No       | 17             |
| A <sub>3</sub><br>1.70-1.60% | 51  | 1.69               | 1.85               | 9.80                                 | Yes      | 19             |
|                              | 30  | 1.64               | 1.89               | 15.7                                 | No       | 20             |
|                              | 32  | 1.64               | 1.80               | 10.1                                 | No       | 16             |
|                              | 55  | 1.66               | 1.81               | 8.96                                 | Yes      | 42             |
|                              | 54  | 1.69               | 1.93               | 13.7                                 | No       | 23             |
| A <sub>4</sub><br>1.50-1.40% | 40  | 1.49               | 1.60               | 7.22                                 | Yes      | 34             |
|                              | 41  | 1.48               | 1.53               | 3.35                                 | Yes      | 18             |
|                              | 53  | 1.41               | 1.55               | 10.6                                 | Yes      | 26             |
|                              | 41  | 1.41               | 1.50               | 5.85                                 | Yes      | 18             |
|                              | 53  | 1.45               | 1.67               | 15.4                                 | Yes      | 16             |

F<sub>E</sub> = End-tidal sevoflurane concentration; F<sub>I</sub> = Inspired sevoflurane concentration; Duration = Total duration of end-tidal sevoflurane at time of incision.

logistic curve.<sup>5</sup> AD<sub>95</sub> was calculated directly from the expression for the best-fitting logistic curve.<sup>4</sup>

### Results

The data are listed in tables 1 and 2. Age, body temperature, and total duration of the end-tidal sevoflurane

concentration at time of incision in group A were not significantly different from those in group B. MAC for sevoflurane alone was  $1.71 \pm 0.07\%$  (SE), AD<sub>95</sub> was  $2.07\%$ , and the slope of the logistic function was  $15.32 \pm 0.24$  (SE) (fig. 1). Addition of  $63.5 \pm 0.4\%$  (SE) end-tidal nitrous oxide reduced sevoflurane MAC to  $0.66 \pm 0.06\%$  (SE) and the AD<sub>95</sub> to  $0.94\%$ .

### Discussion

We assume that end-tidal sevoflurane concentration (partial pressure) adequately reflects arterial (brain) sevoflurane partial pressure. The end-tidal concentration was kept constant for a minimum of 15 min, thus assuring that the sevoflurane partial pressure in the brain was equilibrated with that in the arterial blood. Eger *et al.* suggested that the end-tidal anesthetic partial pressure reflected arterial anesthetic partial pressure when the difference between inspired and end-tidal concentration was small.<sup>7</sup> Sevoflurane, with a blood/gas partition coefficient of 0.60,<sup>8</sup> is similar to that of nitrous oxide, and is less soluble than the other, more potent agents currently used in clinical practice. Thus, the inspired-end-tidal difference decreases rapidly. The inspired-arterial (end-tidal) difference averaged less than 10% (mean 9.6%) of the alveolar concentration in group A. With as much as 10% contamination of alveolar gas with inspired gas, the measured end-tidal partial pressure would be less than 2.5% higher than true alveolar (arterial) partial pressure.<sup>7</sup>

Many studies have suggested that MAC is correlated with the oil/gas partition coefficient.<sup>9,10</sup> The product of

TABLE 2. Data Obtained in Group B, Sevoflurane With N<sub>2</sub>O

| Group                        | Age | F <sub>E</sub> (%) | F <sub>I</sub> (%) | $\frac{(F_I - F_E)}{F_E} \times 100$ | N <sub>2</sub> O (%) | Movement | Duration (Min) |
|------------------------------|-----|--------------------|--------------------|--------------------------------------|----------------------|----------|----------------|
| B <sub>1</sub><br>1.05-0.95% | 56  | 0.99               | 1.02               | 3.81                                 | 63.3                 | No       | 24             |
|                              | 35  | 0.98               | 1.02               | 4.81                                 | 63.6                 | No       | 18             |
|                              | 42  | 1.02               | 1.10               | 7.34                                 | 64.3                 | No       | 37             |
|                              | 32  | 0.98               | 1.03               | 5.77                                 | 63.2                 | No       | 23             |
|                              | 47  | 1.03               | 1.10               | 6.36                                 | 63.8                 | No       | 21             |
| B <sub>2</sub><br>0.85-0.75% | 44  | 0.84               | 0.92               | 8.82                                 | 63.3                 | No       | 36             |
|                              | 52  | 0.81               | 0.86               | 6.12                                 | 64.5                 | No       | 21             |
|                              | 58  | 0.79               | 0.85               | 7.29                                 | 62.3                 | No       | 23             |
|                              | 36  | 0.81               | 0.85               | 5.10                                 | 63.7                 | Yes      | 19             |
|                              | 43  | 0.81               | 0.86               | 6.17                                 | 63.7                 | No       | 19             |
| B <sub>3</sub><br>0.65-0.55% | 54  | 0.64               | 0.67               | 5.19                                 | 64.3                 | Yes      | 27             |
|                              | 59  | 0.62               | 0.63               | 1.33                                 | 62.6                 | No       | 22             |
|                              | 41  | 0.60               | 0.64               | 5.48                                 | 64.1                 | Yes      | 32             |
|                              | 40  | 0.64               | 0.65               | 2.60                                 | 63.3                 | Yes      | 27             |
|                              | 42  | 0.60               | 0.63               | 4.11                                 | 63.2                 | No       | 16             |
| B <sub>4</sub><br>0.45-0.35% | 40  | 0.41               | 0.43               | 4.00                                 | 62.7                 | Yes      | 31             |
|                              | 39  | 0.41               | 0.45               | 8.00                                 | 63.0                 | Yes      | 18             |
|                              | 49  | 0.43               | 0.45               | 3.85                                 | 63.0                 | Yes      | 19             |
|                              | 41  | 0.40               | 0.41               | 2.04                                 | 64.3                 | Yes      | 20             |
|                              | 39  | 0.42               | 0.45               | 5.88                                 | 63.5                 | Yes      | 16             |

F<sub>E</sub> = End-tidal sevoflurane concentration; F<sub>I</sub> = Inspired sevoflurane

concentration; N<sub>2</sub>O = End-tidal nitrous oxide concentration; Duration = Total duration of end-tidal sevoflurane at time of incision.

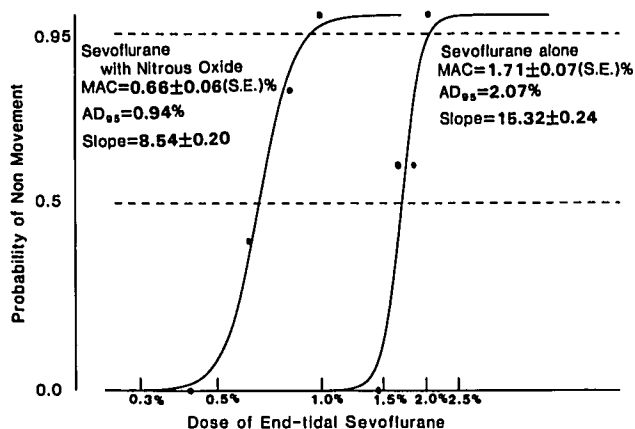

FIG. 1. The percentage of patients within each subgroup that moved was plotted against the subgroup's mean end-tidal sevoflurane concentration. Dose-response curves derived from data in tables 1 and 2. These two curves are the best-fitting logistic curves to individual observations. Probability of non-movement (not responding to skin incision) is represented by the vertical axis. The logarithm of the end-tidal sevoflurane concentration is represented by the horizontal axis. The curve on the right is for sevoflurane alone. MAC, the concentration at which probability of movement equals 0.5, is  $1.71 \pm 0.07\%$  (SE).  $AD_{95}$ , the concentration at which 95% of patients do not move in response to skin incision, is  $2.07\%$ . The slope of the logistic curve is  $15.32 \pm 0.24$  (SE). The curve on the left is for sevoflurane with 63.5% end-tidal nitrous oxide. MAC is  $0.66 \pm 0.06\%$  (SE).  $AD_{95}$  is  $0.94\%$ . The slope is  $8.53 \pm 0.20$  (SE).

oil/gas partition coefficient times MAC for all anesthetics is a constant. The predicted sevoflurane MAC based on its oil/gas partition coefficient of 55<sup>11</sup> is 2.6%—or 52% greater than what was actually found. However, sevoflurane MAC predicted by Halsey is 1.7%, based on determinations in other species or systems.<sup>12</sup> The  $AD_{95}$  of 2.07% was about 20% greater than MAC, a similar relationship to that which exists with halothane.<sup>4</sup>

Nitrous oxide was very effective in decreasing sevoflurane MAC. The decrease was almost identical to the reduction in halothane MAC caused by a similar concentration of nitrous oxide.<sup>10</sup> If nitrous oxide has an additive effect, we can calculate the MAC for nitrous oxide alone as 104% (63.5 divided by 0.614). This is identical to that found by Hornbein *et al.* when nitrous oxide in oxygen was used under hyperbaric conditions.<sup>13</sup>

The addition of 63.5% end-tidal nitrous oxide reduced sevoflurane MAC by 1.05% (1.71 minus 0.66). If 63.5% nitrous oxide is equipotent to 1.05% sevoflurane, the predicted  $AD_{95}$  for sevoflurane with 63.5% end-tidal nitrous oxide is 1.02% (2.07 minus 1.05)—close to what was actually found, 0.94%.

## References

1. Holaday DA, Smith FR: Clinical characteristics and biotransformations of sevoflurane in healthy human volunteers. *ANESTHESIOLOGY* 54:100-106, 1981
2. Kazama T, Ikeda K: The comparative cardiovascular effects and induction time of sevoflurane with isoflurane and halothane in dogs. (Abstract) *ANESTHESIOLOGY* 63:A17, 1985
3. Eger EI, Saidman LJ, Brandstater B: Minimum alveolar concentration: a standard of anesthetic potency. *ANESTHESIOLOGY* 26:756-763, 1965
4. de Jong RH, Eger EI: MAC expanded:  $AD_{50}$  and  $AD_{95}$  values of common inhalation anesthetics in man. *ANESTHESIOLOGY* 42:384-389, 1975
5. Waud DR: On biological assays involving quantal response. *J Pharmacol Exp Ther* 183:577-607, 1972
6. Stevens WC, Dolan WM, Gibbons RT, White A, Eger EI, Millar RD, de Jong RH, Elashoff RM: Minimum alveolar concentrations (MAC) of isoflurane with and without nitrous oxide in patients of various ages. *ANESTHESIOLOGY* 42:197-200, 1975
7. Eger EI, Bahlman SH: Is end-tidal anesthetic partial pressure an accurate measure of the arterial anesthetic partial pressure? *ANESTHESIOLOGY* 35:301-303, 1971
8. Wallin RF, Regan BM, Napoli MD, Stern IJ, Giove M: Sevoflurane, a new inhalational anesthetic agent. *Anesth Analg* 54:758-765, 1975
9. Saidman LJ, Eger EI, Munson ES, Babad AA, Muallem M: Minimum alveolar concentrations of methoxyflurane, halothane, ether and cyclopropane in man: Correlation with theories of anesthesia. *ANESTHESIOLOGY* 28:994-1002, 1967
10. Saidman LJ, Eger EI: Effect of nitrous oxide and of narcotic premedication on the alveolar concentration of halothane required for anesthesia. *ANESTHESIOLOGY* 25:302-306, 1964
11. Cook TL, Beppu WJ, Hitt BA, Kosek JC, Mazze RI: Renal effects and metabolism of sevoflurane in Fischer 344 rats: An *in-vivo* and *in-vitro* comparison with methoxyflurane. *ANESTHESIOLOGY* 43:70-77, 1975
12. Halsey MJ: A reassessment of the molecular structure functional relationships of the inhaled general anaesthetics. *Br J Anaesth* 56:9S-25S, 1984
13. Hornbein TF, Eger EI, Winter PM, Smith G, Wetstone D, Smith KH: The minimum alveolar concentration of nitrous oxide in man. *Anesth Analg* 61:553-556, 1982
